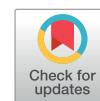

# Endoscopic Duodenal-Jejunal Bypass Liner Treatment for Type 2 Diabetes and Obesity: Glycemic and Cardiovascular Disease Risk Factor Improvements in 1,022 Patients Treated Worldwide

Diabetes Care 2023;46:e89–e91 | <https://doi.org/10.2337/dc22-1952>

Robert E.J. Ryder,<sup>1</sup> Katharina Laubner,<sup>2</sup> Marek Benes,<sup>3</sup> Martin Haluzik,<sup>3</sup> Lynne Munro,<sup>4</sup> Harry Frydenberg,<sup>4</sup> Julian P. Teare,<sup>5</sup> Aruchuna Ruban,<sup>5</sup> Sigal Fishman,<sup>6</sup> Erwin Santo,<sup>6</sup> Rainer Stengel,<sup>7</sup> Charlotte De Jonge,<sup>8,9,10</sup> Jan W. Greve,<sup>11,12</sup> Ricardo V. Cohen,<sup>13</sup> Cristina M. Aboud,<sup>13</sup> Gerald J. Holtmann,<sup>14</sup> Graeme Rich,<sup>15</sup> Jess J. McMaster,<sup>14</sup> Tadej Battelino,<sup>16,17</sup> Primož Kotnik,<sup>17</sup> James P. Byrne,<sup>18</sup> John C. Mason,<sup>19</sup> Justin Bessel,<sup>20</sup> Jeanine Bascomb,<sup>21</sup> Lillian Kow,<sup>21</sup> Janes Collins,<sup>22</sup> Jacob Chisholm,<sup>22</sup> Peter N. Pferschy,<sup>23</sup> Harald Sourij,<sup>23</sup> Melissa L. Cull,<sup>1</sup> Melanie C. Wyres,<sup>1</sup> Russell Drummond,<sup>24</sup> Barbara McGowan,<sup>25</sup> Stephanie A. Amiel,<sup>26</sup> Mahi Yadagiri,<sup>1</sup> Piya Sen Gupta,<sup>1,25</sup> Jens Aberle,<sup>27</sup> and Jochen Seufert<sup>2</sup>

There is a worldwide pandemic of type 2 diabetes (T2D) and obesity (1). In clinical practice, many patients with obesity have poor glycemic management despite diet and lifestyle advice and maximal medications (2–4). In this situation, Roux-en-Y gastric bypass is highly effective, and increased use of bariatric surgery has been recommended (2). Nevertheless, it is an invasive and irreversible surgical procedure. EndoBarrier (GI Dynamics, Boston, MA), also known as duodenal-jejunal bypass liner, is a 60-cm impermeable fluoropolymer sleeve that is implanted

endoscopically into the upper part of the small intestine (2–4), left in place for up to 1 year, and then removed endoscopically. The duodenal-jejunal bypass liner was developed to mimic the proposed small-bowel mechanisms of Roux-en-Y gastric bypass (2–4) while being less invasive. In Europe in 2017, approval for use (certificate of Conformité Européenne, or CE mark) of EndoBarrier was not renewed for reasons that are not entirely clear (3,4). As over 3,000 patients have been treated with EndoBarrier worldwide, during 2017, an independent,

secure, online registry was established by the Association of British Clinical Diabetologists (ABCD) for the collection of safety and efficacy data of EndoBarrier-treated patients worldwide.

By October 2022, data had been entered on 1,022 EndoBarrier-treated patients (mean  $\pm$  SD age 51.3  $\pm$  11.4 years, 52.5% male, 84.9% with diabetes, mean  $\pm$  SD BMI 41.1  $\pm$  8.7 kg/m<sup>2</sup>) from 34 centers in 10 countries. For those with both baseline and time-of-removal data, EndoBarrier treatment was associated with considerable reduction in weight, HbA<sub>1c</sub>, systolic

<sup>1</sup>Diabetes and Endocrinology, Sandwell and West Birmingham Hospitals National Health Service Trust, Birmingham, U.K.

<sup>2</sup>Division of Endocrinology and Diabetology, Department of Medicine II, University Hospital of Freiburg, Freiburg, Germany

<sup>3</sup>Diabetes Centre, Institute for Clinical and Experimental Medicine, Praha, Czech Republic

<sup>4</sup>Epworth Centre for Bariatric Surgery, Richmond, Australia

<sup>5</sup>Gastroenterology, Imperial College London, London, U.K.

<sup>6</sup>Gastroenterology, Tel Aviv Sourasky Medical Center, Tel Aviv, Israel

<sup>7</sup>Diabetes, Diakonissenanstalt Emmaus Niesky, Niesky, Germany

<sup>8</sup>Catharina Hospital, Eindhoven, the Netherlands

<sup>9</sup>General Surgery, Maastricht UMC+, Maastricht, the Netherlands

<sup>10</sup>Atrium Medical Center Parkstad, Heerlen, the Netherlands

<sup>11</sup>Zuyderland Medical Centre Heerlen, Heerlen, the Netherlands

<sup>12</sup>Metabolic and Bariatric Surgery, Maastricht UMC+, Maastricht, the Netherlands

<sup>13</sup>Specialized Center for Obesity and Diabetes, Hospital Alemão Oswaldo Cruz, São Paulo, Brazil

<sup>14</sup>Department of Gastroenterology and Hepatology, Princess Alexandra Hospital, Woolloongabba, Australia

<sup>15</sup>Sydney Adventist Hospital, Wahroonga, Australia

<sup>16</sup>Department of Pediatric Endocrinology, Diabetes, and Metabolic Diseases, University Children's Hospital, Ljubljana, Slovenia

<sup>17</sup>Medical Faculty, University of Ljubljana, Ljubljana, Slovenia

<sup>18</sup>Surgery, University Hospital Southampton National Health Service Foundation Trust, Southampton, U.K.

<sup>19</sup>Gastroenterology, Manchester University National Health Service Foundation Trust, Manchester, U.K.

**Table 1—Benefits of EndoBarrier among 1,022 patients from 33 centers in 10 countries**

|                                                                         | <i>n</i> | Baseline     | At removal   | Difference  | <i>P</i> value |
|-------------------------------------------------------------------------|----------|--------------|--------------|-------------|----------------|
| Impact of EndoBarrier treatment on weight, systolic BP, and cholesterol |          |              |              |             |                |
| Weight (kg)                                                             | 811      | 120.2 ± 25.3 | 106.9 ± 23.8 | −13.3 ± 9.7 | <0.001         |
| BMI (kg/m <sup>2</sup> )                                                | 808      | 41.2 ± 10.0  | 36.6 ± 8.8   | −4.6 ± 3.6  | <0.001         |
| Systolic BP (mmHg)                                                      | 448      | 135.7 ± 18.0 | 129.5 ± 17.0 | −6.3 ± 19.2 | <0.001         |
| Cholesterol (mmol/L)                                                    | 467      | 4.8 ± 1.2    | 4.2 ± 1.0    | −0.6 ± 1.03 | <0.001         |
| Impact of EndoBarrier treatment on HbA <sub>1c</sub> ranges (%)         |          |              |              |             |                |
| All                                                                     | 646      | 8.3 ± 1.8    | 7.1 ± 1.3    | −1.3 ± 1.5  | <0.001         |
| HbA <sub>1c</sub> 7.0–7.9                                               | 141      | 7.5 ± 0.3    | 6.8 ± 0.8    | −0.7 ± 0.8  | <0.001         |
| HbA <sub>1c</sub> 8.0–8.9                                               | 158      | 8.4 ± 0.3    | 7.3 ± 1.0    | −1.1 ± 1.0  | <0.001         |
| HbA <sub>1c</sub> 9.0–9.9                                               | 96       | 9.4 ± 0.3    | 7.8 ± 1.1    | −1.6 ± 1.1  | <0.001         |
| HbA <sub>1c</sub> ≥10                                                   | 111      | 11.2 ± 1.2   | 8.0 ± 1.5    | −3.2 ± 1.7  | <0.001         |
| Impact of EndoBarrier treatment on BMI ranges (kg/m <sup>2</sup> )      |          |              |              |             |                |
| All                                                                     | 808      | 41.2 ± 10.0  | 36.6 ± 8.8   | −4.6 ± 3.6  | <0.001         |
| BMI 23.0–29.9                                                           | 24       | 28.3 ± 1.9   | 26.0 ± 2.2   | −2.2 ± 1.9  | <0.001         |
| BMI 30.0–34.9                                                           | 144      | 32.9 ± 1.4   | 29.8 ± 2.6   | −3.1 ± 2.4  | <0.001         |
| BMI 35.0–39.9                                                           | 253      | 37.6 ± 1.4   | 33.3 ± 2.9   | −4.3 ± 2.6  | <0.001         |
| BMI ≥40                                                                 | 387      | 47.5 ± 10.4  | 41.9 ± 9.7   | −5.5 ± 4.2  | <0.001         |

Data are from the Worldwide EndoBarrier Registry and are mean ± SD unless otherwise specified. The centers are located in Australia, Austria, Brazil, Czech Republic, England, Germany, Israel, the Netherlands, Scotland, and Slovenia. BP, blood pressure.

blood pressure, and cholesterol (Table 1). The higher the initial HbA<sub>1c</sub>, the greater the reduction (Table 1), with HbA<sub>1c</sub> reduction of 3.2% (34.9 mmol/mol) when initial HbA<sub>1c</sub> was ≥10.0% (86 mmol/mol). Similarly, the higher the initial BMI, the greater the reduction (Table 1). There were no differences in HbA<sub>1c</sub> or weight reduction by age or sex.

There were 43 (4.2%) serious adverse events (SAE). These included early removal because of gastrointestinal bleeding in 24 patients (2.3%), liver abscess in 11 patients (1.1%) (including 8 prompting early removal and 3 found during routine explant), pancreatitis or cholecystitis in 4 patients (0.4%), and liver abscess after prolonged implant duration of more than 1 year in 2 patients (0.2%). Adverse

events that were less serious occurred in 139 patients (13.6%). These included early removal because of gastrointestinal symptoms or migration or liner obstruction in 7.3% (75 patients) and precautionary hospitalization for gastrointestinal symptoms, difficult removal, or endoscopy in 6.3% (64 patients).

Data from patients both with and without diabetes was entered into the registry retrospectively, with contributors entering only the data that they had available, which is therefore incomplete. For example, some patients without diabetes did not have HbA<sub>1c</sub> assessed (646 of 1,022 [63%] had HbA<sub>1c</sub> assessment). This represents a limitation; the analysis is of a heterogeneous group. Sufficient data to analyze the impact of EndoBarrier on

diabetes medications was not available from all the centers, although one center with 62 patients reported that the device was associated with considerable reduction in insulin dose, with about 30% being able to discontinue insulin (3,4). Decrease in medication dosages and/or discontinuation of antidiabetes medication, including insulin, is a recognized benefit of EndoBarrier treatment (2).

In summary, in the worldwide EndoBarrier registry, the mean weight loss during EndoBarrier implantation was 13.3 kg (11.1% decrease in body weight from baseline), with associated improvements in glycemic control, blood pressure, and cholesterol. This reduction in microvascular and macrovascular risk factors could reduce the complications of T2D (3,4). All patients with SAE made a full recovery, and most experienced benefits despite the SAE. Some centers reported SAE that may have been avoided if patients had adhered to guidelines (3). The rate of early removal for hepatic abscess (1.1%) was noticeably less than the 3.5% rate in the original U.S. pivotal trial (2). The mechanism of hepatic abscess formation is presumably related to portal bacteremia from the device. Daily temperature monitoring (for early detection) has been added to the new U.S. pivotal study (5) to assess the effect on hepatic abscess complication. Limiting the implantation period to 9 months may also reduce the complication rate. In Europe there is currently an application for restoration of the CE mark (3). It is noteworthy that endoscopy units are ubiquitous in health care systems, as are skilled endoscopists. For the increasing numbers of patients with refractory uncontrolled T2D and obesity worldwide, there is no readily available treatment option; the potential demand is too great for available metabolic surgery resources. Therefore, if the

<sup>20</sup>Surgery, Calvary North Adelaide Hospital, Adelaide, Australia

<sup>21</sup>Wakefield Clinic, Adelaide, Australia

<sup>22</sup>Adelaide Bariatric Centre, Flinders Medical Centre, Bedford Park, Australia

<sup>23</sup>Internal Medicine, Division of Endocrinology and Diabetology, Interdisciplinary Metabolic Medicine Trials Unit, Medical University of Graz, Graz, Austria

<sup>24</sup>Diabetes, Endocrinology, and Clinical Pharmacology, University of Glasgow, Glasgow, U.K.

<sup>25</sup>Diabetes and Endocrinology, Guy's and St. Thomas' Hospital, London, U.K.

<sup>26</sup>Diabetes Research Group, Division of Diabetes and Nutritional Sciences, King's College London, London, U.K.

<sup>27</sup>Endokrinologie und Diabetologie, Universitätsklinikum Hamburg-Eppendorf Ringgold, Hamburg, Germany

Corresponding author: Robert E.J. Ryder, bob.ryder@nhs.net

Received 6 October 2022 and accepted 23 December 2022

R.E.J.R. and K.L. are joint first authors.

© 2023 by the American Diabetes Association. Readers may use this article as long as the work is properly cited, the use is educational and not for profit, and the work is not altered. More information is available at <https://www.diabetesjournals.org/journals/pages/license>.

safety concerns can be successfully addressed, it is possible that EndoBarrier will become widely available. There may also be a case for head-to-head comparisons of EndoBarrier with the other endoscopically implanted device, the gastric balloon.

This international registry data from a large number of patients raises the possibility that the benefits of EndoBarrier outweigh the risks. With monitoring and prompt removal of EndoBarrier if indicated, this treatment may be a useful option.

**Funding.** The ABCD provided funding to support the establishment of the ABCD Worldwide EndoBarrier Registry.

**Duality of Interest.** R.E.J.R. has received speaker fees, consultancy fees, and/or educational sponsorships from Abbott, BioQuest, GI Dynamics, and Novo Nordisk. J.S. and K.L. have received honoraria for speaker bureau, consultancy, and research funding from GI Dynamics. No other potential conflicts of interest relevant to this article were reported.

**Author Contributions.** R.E.J.R. established and led the registry on behalf of ABCD, and he analyzed the data. R.E.J.R., K.L., and J.S. wrote the manuscript. K.L., R.S., J.A., and J.S. contributed the German data. M.B. and M.H. contributed the Czech data. L.M., H.F., G.J.H., G.R., J.J.M., J.Be., J.Ba., J.Co., and J.Ch. contributed the Australian data. R.E.J.R., J.P.T., A.R., J.P.B., J.C.M., M.L.C., M.C.W., B.M., S.A.M., M.Y., and P.S.G. contributed the English data. S.F. and E.S. contributed the Israeli data. C.D.J. and J.W.G. contributed the Dutch data. R.V.C. and C.M.A. contributed the Brazilian data. T.B. and P.K. contributed the Slovenian data, P.N.P. and H.S. contributed the Austrian data, and R.D. contributed the Scottish data. R.E.J.R. is the guarantor of this work and, as such, had full access to all the data in the study and takes responsibility for the integrity of the data and the accuracy of the data analysis.

**Prior Presentation.** This study was an oral presentation at the European Association for the Study of Diabetes 58th Annual Meeting in Stockholm, Sweden, 19–23 September 2022.

## References

1. International Diabetes Federation. Diabetes around the world in 2021. In: IDF Diabetes

Atlas, 10th ed. Brussels, Belgium, International Diabetes Federation, 2021. Accessed 14 October 2022. Available from <https://diabetesatlas.org/>

2. Jirapinyo P, Haas AV, Thompson CC. Effect of the duodenal-jejunal bypass liner on glycemic control in patients with type 2 diabetes with obesity: a meta-analysis with secondary analysis on weight loss and hormonal changes. *Diabetes Care* 2018;41:1106–1115

3. Ryder REJ, Irwin SP, Burbridge W, et al. The United Kingdom's first NHS EndoBarrier service for advanced diabetes: 1-year outcomes for all 62 treated patients. *Br J Diabetes* 2019;19:110–117

4. Ryder REJ, Yadagiri M, Burbridge W, et al. Duodenal-jejunal bypass liner for treatment of type 2 diabetes and obesity: 4-year outcomes in the first National Health Service (NHS) EndoBarrier service. *Br J Diabetes* 2022;22:82–86

5. GI Dynamics. EndoBarrier system pivotal trial (Rev E) (STEP-1). In: ClinicalTrials.gov. Bethesda, MD, National Library of Medicine, 2000. NLM Identifier: NCT04101669. Accessed 14 October 2022. Available from <https://clinicaltrials.gov/ct2/show/NCT04101669>
